# Supplementary material for: Computational Design of High-Affinity Blockers for Sodium Channel NaV1.2 from μ-Conotoxin KIIIA
Source: MDPI journal article supplement (doi:10.3390/md20020154), 2022-02-21
Supplement: s1 [file s1]

## Supplementary Materials

### Computational Design of High-Affinity Blockers for Sodium Channel NaV1.2 from $\mu$ -Conotoxin KIIIA

#### Sequence alignment used in homology modelling

**Table S1.** Sequence alignment of the target and uploaded template. The missing residues in the template are indicated by the dashes.

The template contained no ligands.

|                       |                                                          |
|-----------------------|----------------------------------------------------------|
| Target                | DVMILTVFCLSVFALIGLQLFMGNLRNKCLQWPPDNSSFEINITSSFFNNSLDGNG |
| template_upload. 1. Å | DVMILTVFCLSVFALIGLQLFMGNLRNKCLQWPPD-----                 |
| Target                | TTFNRTVSIFNWDEYIEDKSHFYFLEGQNDALLCGNSSDAGQCPEGYICVKAGR   |
| template_upload. 1. Å | -----FNWDEYIEDKSHFYFLEGQNDALLCGNSSDAGQCPEGYICVKAGR       |
| Target                | PNYGYTSFDIFSWAFLSLFRLMTQDFWENLYQLTLRAAGKTYMIFVVLVIFLG    |
| template_upload. 1. Å | PNYGYTSFDIFSWAFLSLFRLMTQDFWENLYQLTLRAAGKTYMIFVVLVIFLG    |
| Target                | YLINLILAVVAMAYEEQNQATLEEAEITLVLAIIVFIFAVVGMQLFGKSYKECVC  |
| template_upload. 1. Å | YLINLILAVVAMAYEEQNQATLEEAEITLVLAIIVFIFAVVGMQLFGKSYKECVC  |
| Target                | KISNDCELPRWHMHDFHFSFLIVFRVLCGEWETMWDCEVAGQTMCLTVFMMVM    |
| template_upload. 1. Å | KISNDCELPRWHMHDFHFSFLIVFRVLCGEWETMWDCEVAGQTMCLTVFMMVM    |
| Target                | VIGNLVVLNLFALLLIPSIMNVLLVCLIFWLIFSIMGVNLFAGKFYHCINYTTG   |
| template_upload. 1. Å | VIGNLVVLNLFALLLIPSIMNVLLVCLIFWLIFSIMGVNLFAGKFYHCINYTTG   |
| Target                | EMFDVSVVNNYSECKALIESNQATARWKNVKVNFNDVGLGYLSLLQVATFKGWMDI |
| template_upload. 1. Å | EMFDVSVVNNYSECKALIESNQATARWKNVKVNFNDVGLGYLSLLQVATFKGWMDI |
| Target                | MYAAVDSRNVELQPKYEDNLYMYLYFVIFIIFGSFFTLNLFIGVIIDNFNQKKK   |
| template_upload. 1. Å | MYAAVDSRNVELQPKYEDNLYMYLYFVIFIIFGSFFTLNLFIGVIIDNFNQKKK   |
| Target                | IRTLFALMMSLPALFNIGLLFLVMFIYAIFGMSNFAYVKREVGIDDMFNFE      |
| template_upload. 1. Å | IRTLFALMMSLPALFNIGLLFLVMFIYAIFGMSNFAYVKREVGIDDMFNFE      |
| Target                | GNSMICLFQITTSAGWDGLLAPILNSGPPDCDPDKDHPGSSVKGDCGNPSVG     |
| template_upload. 1. Å | GNSMICLFQITTSAGWDGLLAPILNSGPPDCDPDKDHPGSSVKGDCGNPSVG     |
| Target                | FVSYIIISFLVWVNMVIAVILENFSVA                              |
| template_upload. 1. Å | FVSYIIISFLVWVNMVIAVILENFSVA                              |

### Time series of the R14 contacts with the channel residues

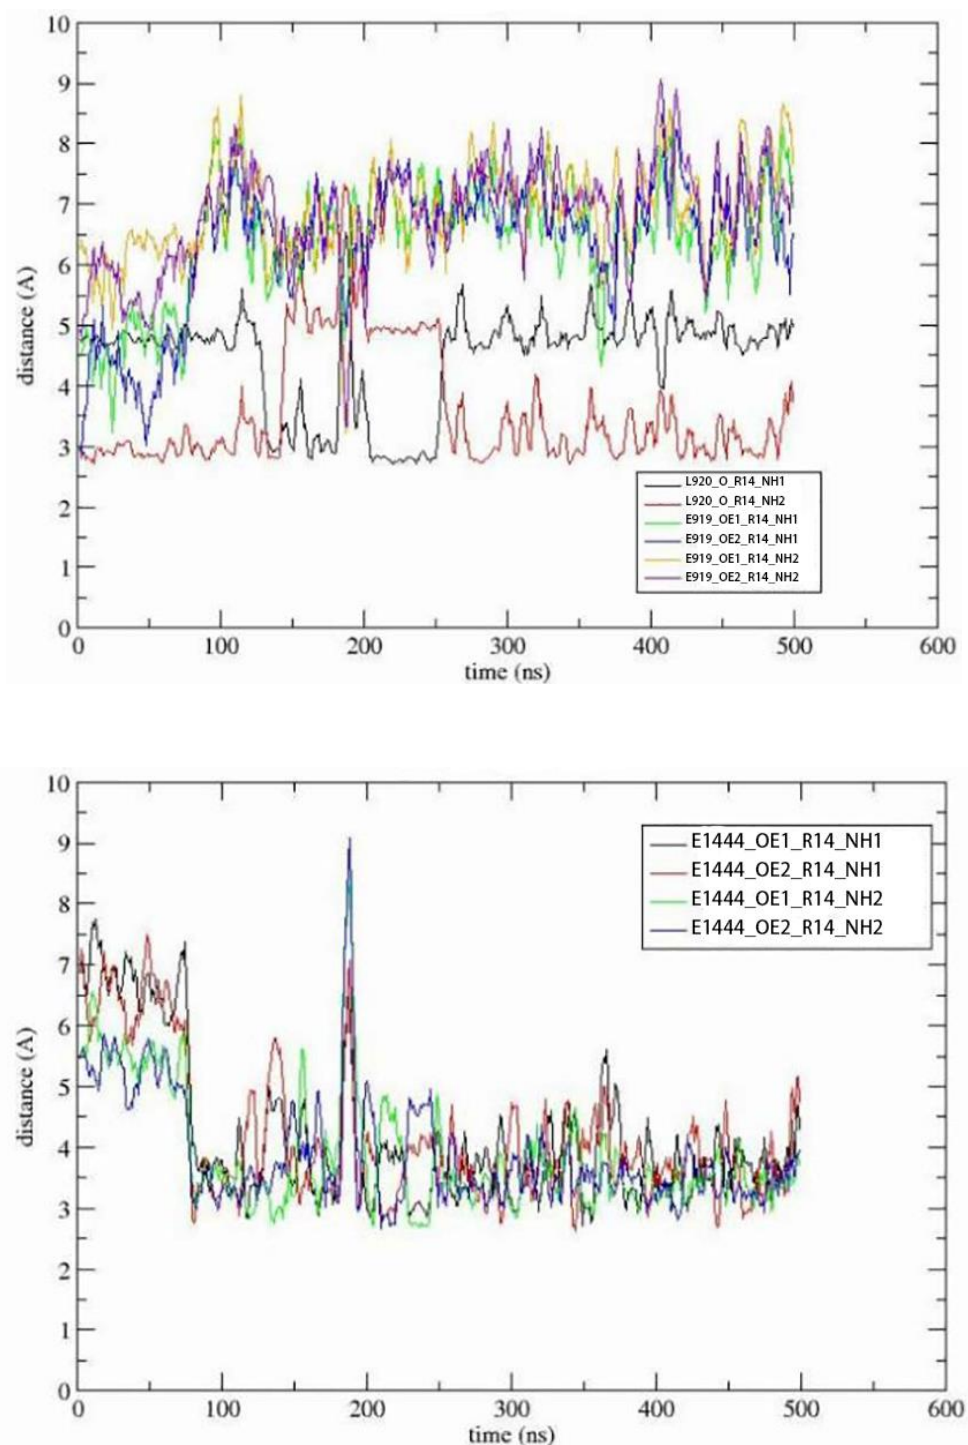

**Figure S1.** The toxin residue R14 makes contact with the channel residues E919, L920 and E1444. The time series of the E919/L920–R14 and E1444–R14 pair distances in the Nav1.2–KIIIA complex are shown at the top and bottom graphs, respectively. After about 100 ns, R14 is seen to switch from E919 to E1414. The E1444–R14 contact is preserved during the rest of the MD simulations.
